# Supplementary material for: Identification and implications of a core bacterial microbiome in 19 clonal cultures laboratory-reared for months to years of the cosmopolitan dinoflagellate Karlodinium veneficum
Source: Front Microbiol. 2022 Aug 4;13:967610. doi: 10.3389/fmicb.2022.967610 (PMC9416233; doi:10.3389/fmicb.2022.967610)
Supplement: Supplementary file 2 [file Data_Sheet_2.xlsx]

## Sheet: Table S1
Table S1. The statistics of obtained sequences data of eukaryotic 28S rRNA gene and prokaryotic 16S rRNA gene amplicons sequencing
The 28S rDNA amplicon sequencing
Sample ID	Raw Tags	Raw Bases (M)	Valid Tags	Valid Bases(M)	Valid%	Q20%	Q30%	GC%
KV1	87348	43.67	81706	35.4	93.54	91.62	80.67	47.87
KV2	86952	43.48	83769	36.3	96.34	96.82	91.05	47.28
KV3	87224	43.61	84296	36.49	96.64	96.21	89.73	47.38
KV4	84820	42.41	82462	30	97.22	97.81	93.52	50.91
KV5	86706	43.35	83027	35.95	95.76	96.76	90.94	47.28
KV6	83146	41.57	79918	34.43	96.12	97.06	91.75	47.23
KV7	81933	40.97	79181	34.09	96.64	97.67	93.12	47.51
KV8	82704	41.35	79941	34.68	96.66	97.62	93.12	47.15
KV9	85442	42.72	82655	35.88	96.74	97.42	92.69	47.15
KV10	80045	40.02	77800	33.79	97.2	97.67	93.07	47.12
KV11	82842	41.42	79982	34.66	96.55	96.75	90.98	47.26
KV12	80635	40.32	77628	33.62	96.27	96.57	90.54	47.31
KV13	84251	42.13	81311	35.24	96.51	96.95	91.42	47.24
KV14	87258	43.63	84193	36.44	96.49	97.11	91.97	47.25
KV15	87020	43.51	84419	36.48	97.01	98.54	94.86	47.35
KV16	81204	40.6	78986	34.13	97.27	98.46	94.72	47.73
KV17	81873	40.94	80501	34.76	98.32	96.36	89.74	47.49
KV18	83192	41.6	82175	35.46	98.78	97.83	93.34	47.43
KV19	84201	42.1	82829	35.62	98.37	97.16	91.71	47.49
The 16S rDNA amplicon sequencing
Sample ID	Raw Tags	Raw Bases (M)	Valid Tags	Valid Bases(M)	Valid%	Q20%	Q30%	GC%
KV1	84653	42.33M	76566	31.91	90.45	98.25	94.36	53.1
KV2	84954	42.48M	75224	31.28	88.55	98.32	94.68	52.84
KV3	80885	40.44M	69675	29.12	86.14	98.13	94.22	53
KV4	87023	43.51M	67158	28.18	77.17	98.03	94.16	53.11
KV5	80442	40.22M	73867	30.9	91.83	98.27	94.66	53.08
KV6	84358	42.18M	78223	32.49	92.73	98.24	94.57	53.65
KV7	83920	41.96M	75989	31.69	90.55	97.92	93.37	52.53
KV8	86144	43.07M	73889	29.04M	85.77	98.5	95.21	51.12
KV9	83571	41.79M	68297	29.02M	81.72	98.32	94.91	53
KV10	85416	42.71M	73294	31.23M	85.81	98.36	94.74	52.55
KV11	86546	43.27M	70478	29.81M	81.43	98.49	95.03	52.29
KV12	83327	41.66M	70495	29.96M	84.6	98.16	94.26	52.64
KV13	84394	42.20M	72409	30.81M	85.8	98.1	94.4	52.63
KV14	82431	41.22M	68977	29.30M	83.68	98.24	94.67	52.45
KV15	83478	41.74M	71553	30.50M	85.71	98.15	94.35	52.63
KV16	87422	43.71M	81498	34.31M	93.22	98.18	94.44	53.35
KV17	84989	42.49M	71598	30.53M	84.24	98	93.98	52.66
KV18	85921	42.96M	70636	29.93M	82.21	97.88	93.82	52.87
KV19	81408	40.70M	65569	27.84M	80.54	98.05	94.09	53.5

## Sheet: Table S2
Table S2. Alpha diversity indices (Chao 1, Observed species, Goods coverage, Shannon and Simpson) of all samples
The 28S rDNA amplicon sequencing
Sample ID	Observed species	Shannon	Simpson	Chao 1	Goods coverage
KV1	49	0.36505	0.0630323	49.1667	0.999953
KV2	81	0.791087	0.142373	82	0.999953
KV3	61	0.822037	0.183212	61	1
KV4	177	3.18661	0.727331	177	0.999976
KV5	75	0.480501	0.0796424	75	1
KV6	97	1.7198	0.323844	97	1
KV7	112	0.923512	0.156722	112.5	0.999953
KV8	63	0.638631	0.121251	64	0.999953
KV9	43	0.310365	0.0545721	43	1
KV10	57	0.432573	0.0743567	57	1
KV11	60	0.809217	0.155065	60	1
KV12	56	0.565302	0.099524	56	0.999976
KV13	81	1.24819	0.238817	81.2	0.999953
KV14	81	0.822783	0.145533	81	0.999976
KV15	82	1.72421	0.347469	92.5	0.999834
KV16	91	0.687138	0.115238	91.75	0.999929
KV17	129	1.89545	0.336085	129	1
KV18	145	1.31723	0.228038	145.6	0.999929
KV19	163	1.8951	0.325166	163.5	0.999953
The 16S rDNA amplicon sequencing
Sample ID	Observed species	Shannon	Simpson	Chao 1	Goods coverage
KV1	113	2.99901	0.775584	113.714	0.999906
KV2	195	4.00522	0.877513	195.261	0.999924
KV3	215	4.28385	0.907227	216.565	0.99983
KV4	244	4.46352	0.907865	244.333	0.999924
KV5	144	3.32497	0.832673	144.588	0.999906
KV6	170	3.54365	0.858529	175.714	0.999698
KV7	265	3.5729	0.791268	266.774	0.999792
KV8	592	4.2552	0.851941	593.529	0.999755
KV9	86	2.293	0.690842	86.125	0.999962
KV10	77	2.55894	0.769736	77.8333	0.999906
KV11	124	3.21321	0.80209	124.273	0.999943
KV12	103	2.72694	0.779691	103.714	0.999906
KV13	74	2.68541	0.789644	74.6	0.999924
KV14	105	2.9584	0.806079	105.333	0.999924
KV15	81	2.59728	0.783264	82	0.999924
KV16	96	3.17759	0.779578	96	0.999981
KV17	85	2.12909	0.668776	85	0.999981
KV18	99	2.97081	0.787786	100.25	0.999906
KV19	89	2.79636	0.788679	89.6667	0.999924

## Sheet: Table S3
Table S3. Annotation and statistics of different classification levels for the 19 samples
The 28S rDNA amplicon sequencing
Sample ID	Phylum	Class	Order	Family	Genus	Species	Feature number	The proportion of feature annotated as “Karlodinium veneficum” *
KV1	4	6	11	13	16	19	49	98.4543
KV2	4	6	10	13	16	17	81	97.1941
KV3	3	5	7	9	10	11	62	97.1301
KV4	3	4	7	9	10	14	117	99.93
KV5	3	4	7	8	9	10	75	99.3128
KV6	3	7	10	12	12	13	97	99.0641
KV7	1	3	4	6	8	10	112	99.4587
KV8	2	5	10	12	8	15	65	97.3342
KV9	2	5	6	8	13	10	44	99.0875
KV10	2	4	5	7	10	13	57	99.5094
KV11	3	7	11	14	14	15	60	97.3344
KV12	4	6	9	11	14	14	57	98.65
KV13	4	6	10	12	14	17	81	97.7544
KV14	2	6	11	14	15	15	85	98.5612
KV15	3	5	9	11	14	17	83	98.9035
KV16	2	5	11	15	16	18	94	99.0173
KV17	3	4	6	8	9	9	129	99.7763
KV18	2	4	7	8	8	9	147	99.7838
KV19	3	4	8	12	12	15	163	99.2577
* "The proportion of feature annotated as “Karlodinium veneficum": The proportion of the feature annotated as “Karlodinium veneficum” to the number of total features in each sample.
The 16S rDNA amplicon sequencing
Sample ID	Phylum	Class	Order	Family	Genus	Species	Feature number
KV1	7	11	26	31	42	44	114
KV2	8	15	39	55	76	92	196
KV3	9	12	32	44	62	72	216
KV4	7	15	42	62	80	96	245
KV5	6	11	29	39	55	65	146
KV6	7	12	37	50	68	73	175
KV7	9	14	41	54	76	82	268
KV8	16	28	72	139	307	397	592
KV9	5	7	19	23	34	44	88
KV10	6	11	26	29	36	41	78
KV11	7	13	28	32	43	54	125
KV12	7	10	29	38	47	54	105
KV13	5	8	25	29	35	37	74
KV14	8	13	28	36	47	51	105
KV15	6	10	26	31	39	44	82
KV16	7	11	33	39	58	61	96
KV17	6	9	19	26	37	48	85
KV18	8	12	25	30	35	48	98
KV19	7	10	20	26	30	47	89
